# Supplementary material for: Regulatory Effects of Three-Dimensional Cultured Lipopolysaccharide-Pretreated Periodontal Ligament Stem Cell-Derived Secretome on Macrophages
Source: MDPI journal article supplement (doi:10.3390/ijms24086981), 2023-04-10
Supplement: s1 [file s1]

# Supporting Information

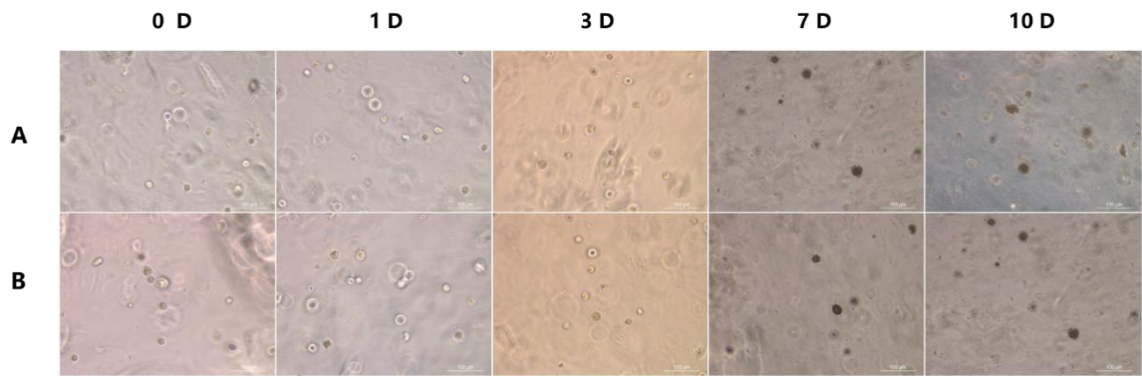

**Figure S1.** Growth states of PDLSCs and LPS pretreated PDLSCs in SupraGel under optical microscope. A, PDLSCs; B, LPS pretreated PDLSCs; D, Day; scale scale: 100  $\mu$ m.

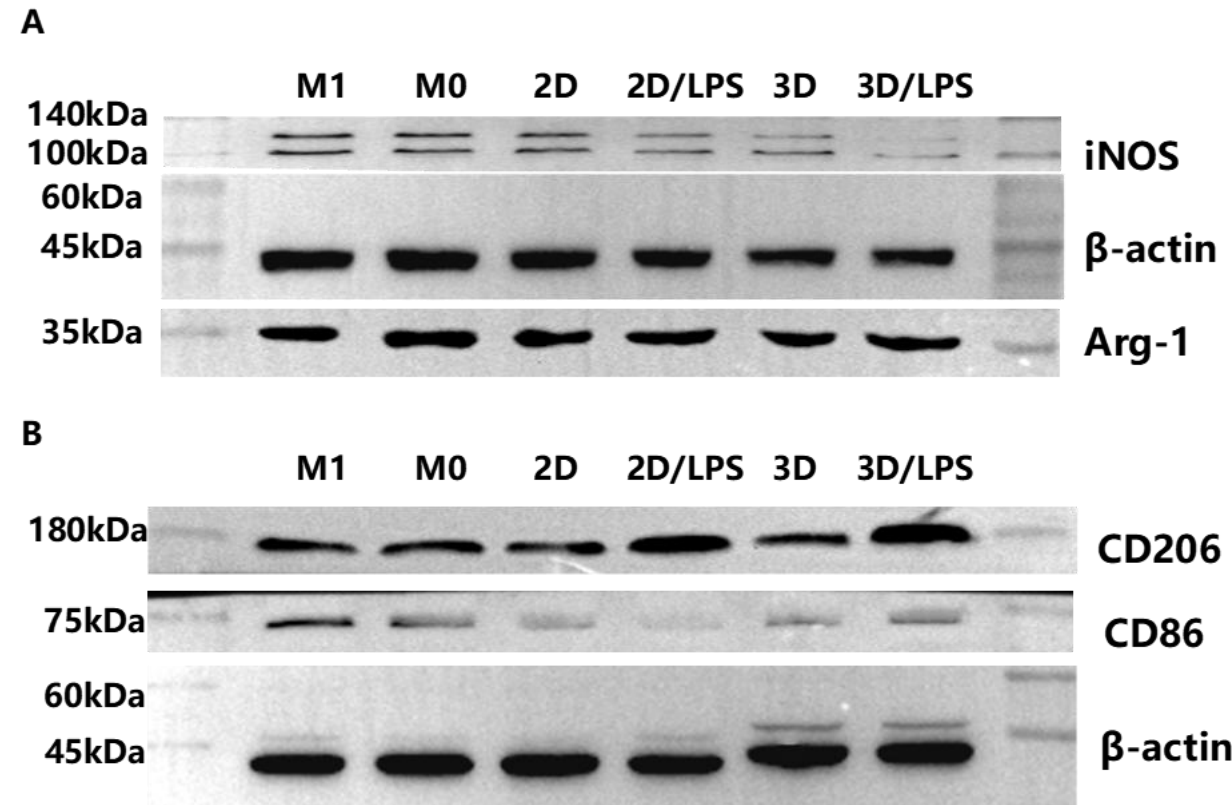

**Figure S2.** Original images of western blots

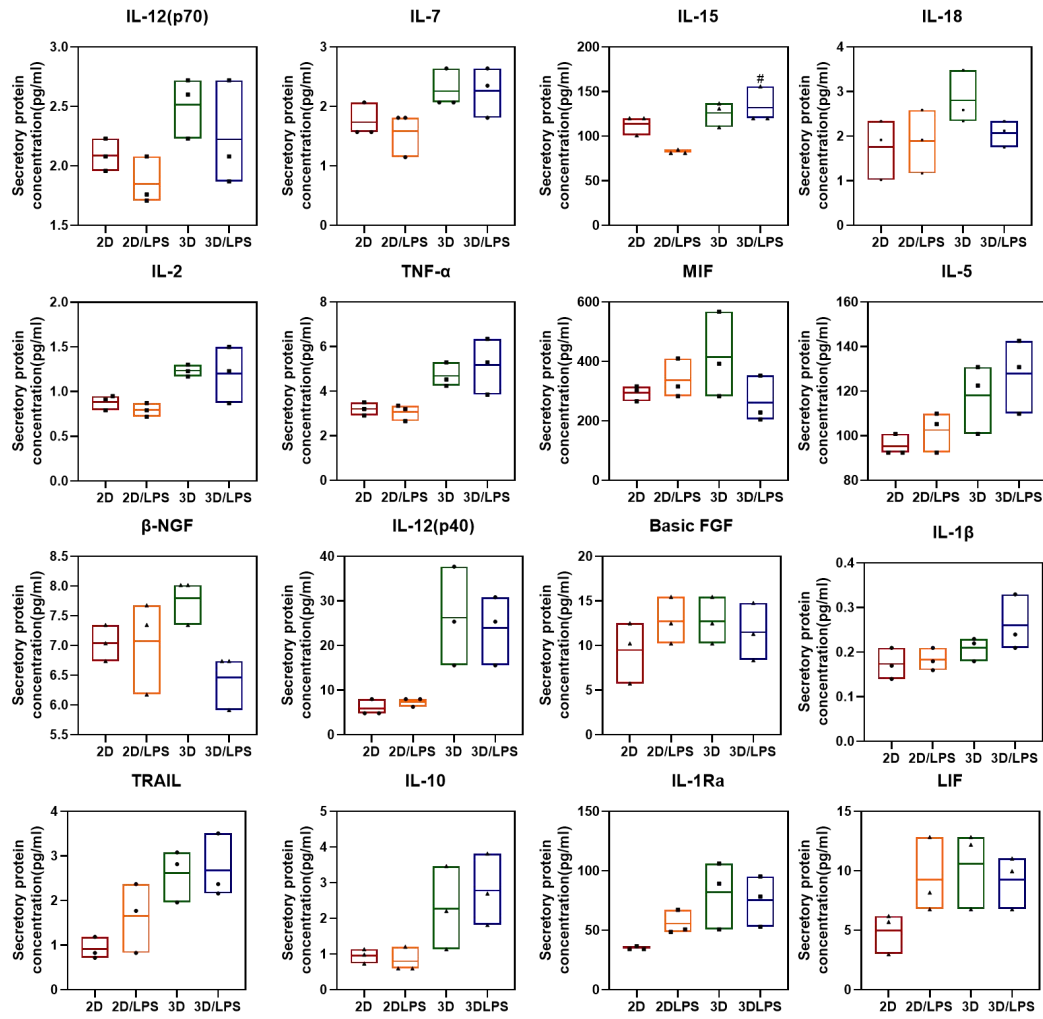

**Figure S3.** Cytokines with no significant changes of PDLSCs derived secretome after LPS and/or 3D culture treatment.
